# Supplementary material for: The divide-and-conquer second-order proton propagator method based on nuclear orbital plus molecular orbital theory for the efficient computation of proton binding energies
Source: Royal Society of Chemistry journal article supplement (doi:10.1039/c6cp03786k), 2016-01-01
Supplement: c6cp03786k1.pdf [file c6cp03786k1.pdf]

## Electronic Supplementary Information

Table S1. PBEs of (HF)<sub>10</sub> (eV) calculated by the NOMO/DC-PP2 method with various buffer regions. Deviations from the NOMO/PP2 results are shown in parentheses. The proton labeling scheme is defined in Fig. 2.

| Proton | Buffer size |        |       |        |       |        |       |         |       |        | NOMO/PP2 |
|--------|-------------|--------|-------|--------|-------|--------|-------|---------|-------|--------|----------|
|        | 0 Å         |        | 1 Å   |        | 2 Å   |        | 3 Å   |         | 4 Å   |        |          |
| 1      | 13.43       | (0.13) | 13.43 | (0.13) | 13.39 | (0.09) | 13.30 | (0.01)  | 13.30 | (0.01) | 13.29    |
| 2      | 14.69       | (0.55) | 14.69 | (0.55) | 14.26 | (0.12) | 14.14 | (0.01)  | 14.14 | (0.01) | 14.13    |
| 3      | 15.31       | (0.60) | 15.31 | (0.60) | 14.84 | (0.14) | 14.71 | (0.00)  | 14.72 | (0.01) | 14.70    |
| 4      | 15.62       | (0.61) | 15.62 | (0.61) | 15.15 | (0.14) | 15.01 | (0.00)  | 15.02 | (0.01) | 15.01    |
| 5      | 15.83       | (0.62) | 15.83 | (0.62) | 15.36 | (0.14) | 15.22 | (0.01)  | 15.23 | (0.01) | 15.21    |
| 6      | 16.01       | (0.62) | 16.01 | (0.62) | 15.54 | (0.14) | 15.40 | (0.01)  | 15.41 | (0.01) | 15.40    |
| 7      | 16.22       | (0.62) | 16.22 | (0.62) | 15.75 | (0.14) | 15.61 | (0.01)  | 15.62 | (0.01) | 15.60    |
| 8      | 16.53       | (0.61) | 16.53 | (0.61) | 16.06 | (0.14) | 15.93 | (0.00)  | 15.93 | (0.01) | 15.92    |
| 9      | 17.10       | (0.58) | 17.10 | (0.58) | 16.65 | (0.13) | 16.52 | (-0.00) | 16.53 | (0.01) | 16.52    |
| 10     | 18.74       | (0.40) | 18.74 | (0.40) | 18.39 | (0.05) | 18.33 | (-0.01) | 18.35 | (0.01) | 18.34    |

Table S2. PBEs of (Gly)<sub>6</sub> (eV) calculated by the NOMO/DC-PP2 method with various buffer regions. Deviations from the NOMO/PP2 results are shown in parentheses. The proton labeling scheme is defined in Fig. 2.

| Proton | Buffer size |         |       |         |       |         |       |        |       |        | NOMO/PP2 |
|--------|-------------|---------|-------|---------|-------|---------|-------|--------|-------|--------|----------|
|        | 2 Å         |         | 3 Å   |         | 4 Å   |         | 5 Å   |        | 6 Å   |        |          |
| 1      | 8.35        | (-2.01) | 10.07 | (-0.29) | 10.39 | (0.03)  | 10.38 | (0.01) | 10.38 | (0.01) | 10.36    |
| 2      | 7.00        | (-3.13) | 9.65  | (-0.48) | 9.30  | (-0.83) | 10.15 | (0.02) | 10.14 | (0.01) | 10.13    |
| 3      | 7.00        | (-3.13) | 9.65  | (-0.48) | 9.30  | (-0.83) | 10.15 | (0.02) | 10.14 | (0.01) | 10.13    |
| 4      | 10.77       | (-2.01) | 12.40 | (-0.38) | 12.83 | (0.05)  | 12.80 | (0.02) | 12.79 | (0.01) | 12.78    |
| 5      | 10.77       | (-2.01) | 12.40 | (-0.38) | 12.83 | (0.05)  | 12.80 | (0.02) | 12.79 | (0.01) | 12.78    |
| 6      | 13.15       | (-0.43) | 13.29 | (-0.28) | 13.51 | (-0.07) | 13.59 | (0.01) | 13.59 | (0.01) | 13.58    |
| 7      | 16.18       | (0.60)  | 15.50 | (-0.08) | 15.57 | (-0.01) | 15.60 | (0.02) | 15.59 | (0.01) | 15.58    |
| 8      | 16.18       | (0.60)  | 15.29 | (-0.29) | 15.57 | (-0.01) | 15.61 | (0.02) | 15.59 | (0.01) | 15.58    |
| 9      | 14.76       | (-0.49) | 15.52 | (0.26)  | 15.35 | (0.10)  | 15.28 | (0.03) | 15.26 | (0.01) | 15.25    |
| 10     | 17.51       | (0.61)  | 16.86 | (-0.04) | 16.97 | (0.07)  | 16.93 | (0.03) | 16.92 | (0.02) | 16.90    |
| 11     | 17.51       | (0.61)  | 16.86 | (-0.04) | 16.97 | (0.07)  | 16.93 | (0.03) | 16.92 | (0.02) | 16.90    |
| 12     | 17.33       | (1.04)  | 16.55 | (0.26)  | 16.39 | (0.10)  | 16.32 | (0.03) | 16.30 | (0.01) | 16.29    |
| 13     | 18.49       | (0.61)  | 17.95 | (0.07)  | 17.96 | (0.07)  | 17.91 | (0.03) | 17.90 | (0.02) | 17.88    |
| 14     | 18.49       | (0.61)  | 17.95 | (0.07)  | 17.96 | (0.07)  | 17.91 | (0.03) | 17.90 | (0.02) | 17.88    |
| 15     | 18.43       | (1.05)  | 17.64 | (0.27)  | 17.48 | (0.10)  | 17.40 | (0.03) | 17.39 | (0.01) | 17.38    |
| 16     | 19.73       | (0.61)  | 19.13 | (0.00)  | 19.20 | (0.07)  | 19.16 | (0.03) | 19.14 | (0.01) | 19.13    |
| 17     | 19.73       | (0.61)  | 19.13 | (0.00)  | 19.20 | (0.07)  | 19.16 | (0.03) | 19.14 | (0.01) | 19.13    |
| 18     | 20.36       | (1.07)  | 19.23 | (-0.06) | 19.33 | (0.04)  | 19.31 | (0.02) | 19.29 | (0.00) | 19.29    |
| 19     | 22.17       | (0.52)  | 21.67 | (0.02)  | 21.67 | (0.02)  | 21.66 | (0.01) | 21.66 | (0.01) | 21.65    |
| 20     | 22.17       | (0.52)  | 21.67 | (0.02)  | 21.67 | (0.02)  | 21.66 | (0.01) | 21.66 | (0.01) | 21.65    |

Table S3. PBEs of C<sub>20</sub>H<sub>22</sub> (eV) calculated by the NOMO/DC-PP2 method with different buffer regions. Deviations from the NOMO/PP2 results are shown in parentheses. The proton labeling scheme is defined in Fig. 2.

| Proton | Buffer size |        |         |        |         |         |         |         |         |         |         |         | NOMO/PP2 |
|--------|-------------|--------|---------|--------|---------|---------|---------|---------|---------|---------|---------|---------|----------|
|        | 1 unit      |        | 2 units |        | 3 units |         | 4 units |         | 5 units |         | 6 units |         |          |
| 1      | 18.56       | (0.03) | 18.53   | (0.00) | 18.53   | (-0.00) | 18.53   | (-0.00) | 18.53   | (-0.00) | 18.53   | (-0.00) | 18.53    |
| 2      | 18.44       | (0.05) | 18.41   | (0.02) | 18.40   | (0.01)  | 18.40   | (0.01)  | 18.40   | (0.00)  | 18.40   | (0.00)  | 18.39    |
| 3      | 18.31       | (0.08) | 18.25   | (0.02) | 18.24   | (0.01)  | 18.24   | (0.01)  | 18.23   | (0.00)  | 18.23   | (0.00)  | 18.23    |
| 4      | 18.09       | (0.05) | 18.06   | (0.02) | 18.05   | (0.01)  | 18.05   | (0.01)  | 18.05   | (0.01)  | 18.03   | (-0.01) | 18.04    |
| 5      | 18.06       | (0.07) | 18.01   | (0.02) | 17.99   | (0.01)  | 17.99   | (0.00)  | 17.99   | (-0.00) | 17.99   | (-0.00) | 17.99    |
| 6      | 18.07       | (0.11) | 17.98   | (0.02) | 17.97   | (0.01)  | 17.98   | (0.02)  | 17.96   | (-0.01) | 17.96   | (-0.00) | 17.96    |
| 7      | 18.06       | (0.11) | 17.97   | (0.02) | 17.96   | (0.01)  | 17.95   | (-0.00) | 17.95   | (0.00)  | 17.95   | (0.00)  | 17.95    |
| 8      | 18.07       | (0.12) | 17.98   | (0.03) | 17.96   | (0.01)  | 17.94   | (-0.00) | 17.95   | (-0.00) | 17.95   | (0.00)  | 17.95    |
| 9      | 18.06       | (0.12) | 17.98   | (0.03) | 17.96   | (0.01)  | 17.95   | (-0.00) | 17.95   | (0.00)  | 17.95   | (0.00)  | 17.95    |
| 10     | 18.07       | (0.12) | 17.98   | (0.03) | 17.94   | (-0.01) | 17.95   | (0.00)  | 17.95   | (0.00)  | 17.95   | (0.00)  | 17.95    |
| 11     | 18.07       | (0.12) | 17.98   | (0.03) | 17.93   | (-0.01) | 17.95   | (0.00)  | 17.95   | (0.00)  | 17.95   | (0.00)  | 17.95    |
| 12     | 18.07       | (0.12) | 17.98   | (0.03) | 17.94   | (-0.01) | 17.95   | (0.00)  | 17.95   | (0.00)  | 17.95   | (0.00)  | 17.95    |
| 13     | 18.07       | (0.12) | 17.98   | (0.03) | 17.93   | (-0.01) | 17.95   | (0.00)  | 17.95   | (0.00)  | 17.95   | (0.00)  | 17.95    |
| 14     | 18.07       | (0.12) | 17.98   | (0.03) | 17.96   | (0.01)  | 17.95   | (-0.00) | 17.95   | (0.00)  | 17.95   | (0.00)  | 17.95    |
| 15     | 18.07       | (0.12) | 17.98   | (0.03) | 17.97   | (0.02)  | 17.95   | (-0.00) | 17.95   | (-0.00) | 17.95   | (0.00)  | 17.95    |
| 16     | 18.07       | (0.11) | 17.98   | (0.02) | 17.97   | (0.01)  | 17.96   | (-0.00) | 17.96   | (0.00)  | 17.96   | (0.00)  | 17.96    |
| 17     | 18.07       | (0.11) | 17.99   | (0.02) | 17.98   | (0.01)  | 17.98   | (0.02)  | 17.96   | (-0.01) | 17.97   | (-0.00) | 17.97    |
| 18     | 18.07       | (0.07) | 18.02   | (0.02) | 18.00   | (0.01)  | 18.00   | (0.00)  | 18.00   | (-0.00) | 18.00   | (-0.00) | 18.00    |
| 19     | 18.10       | (0.05) | 18.07   | (0.02) | 18.06   | (0.01)  | 18.06   | (0.01)  | 18.05   | (0.01)  | 18.04   | (-0.01) | 18.05    |
| 20     | 18.33       | (0.08) | 18.27   | (0.02) | 18.26   | (0.01)  | 18.25   | (0.01)  | 18.25   | (0.00)  | 18.25   | (0.00)  | 18.25    |
| 21     | 18.46       | (0.05) | 18.42   | (0.02) | 18.42   | (0.01)  | 18.41   | (0.01)  | 18.41   | (0.00)  | 18.41   | (0.00)  | 18.41    |
| 22     | 18.57       | (0.03) | 18.54   | (0.00) | 18.54   | (-0.00) | 18.54   | (-0.00) | 18.54   | (-0.00) | 18.54   | (-0.00) | 18.54    |
